# Supplementary material
Source: MDPI journal article supplement (https://www.mdpi.com/2071-1050/14/3/1800)
Supplement: s1 [file s1]

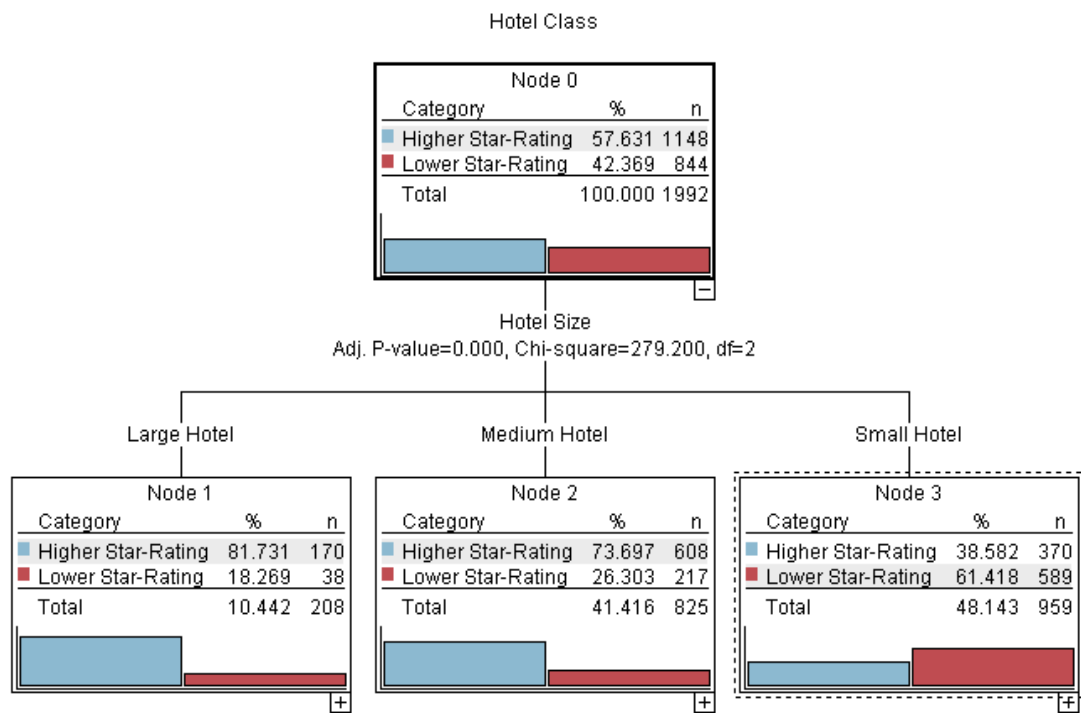

**Figure S1.** Online complaining behavior for different hotel classes (hotel size node), using the whole dataset (100%).

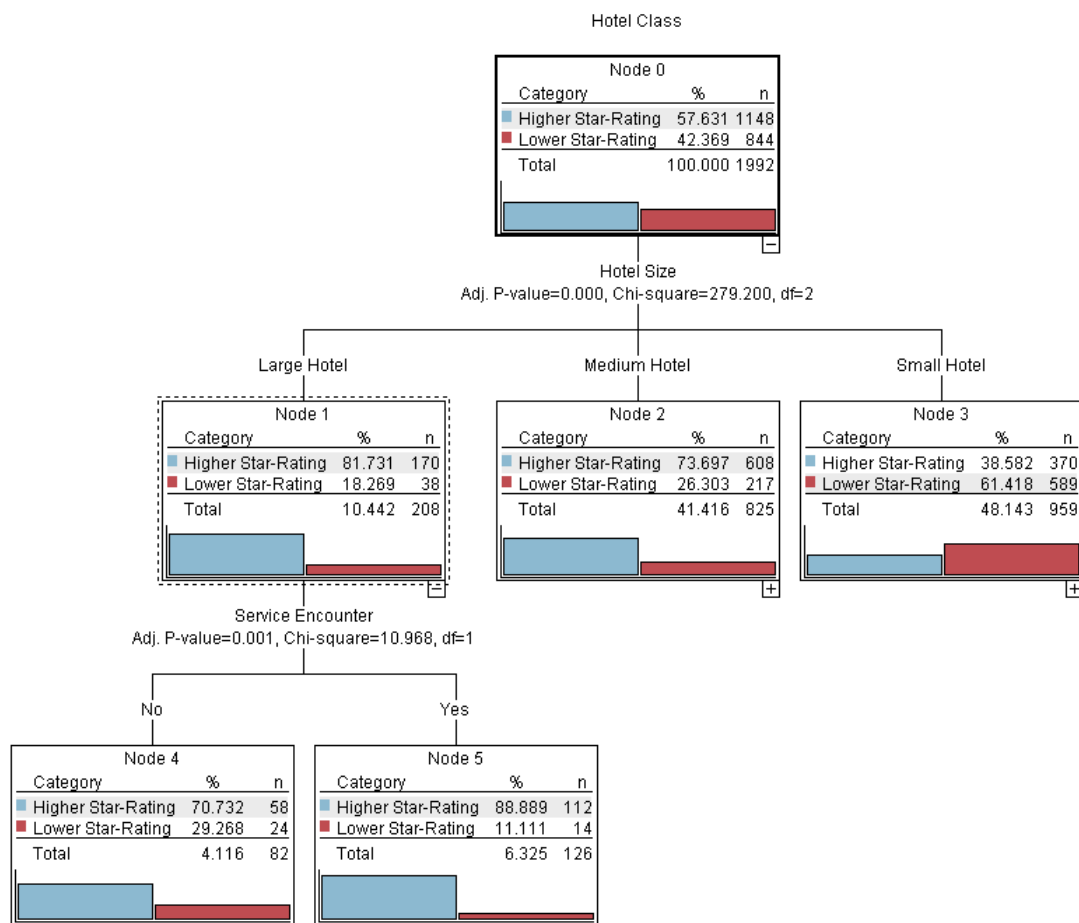

**Figure S2.** Online complaining behavior for different hotel classes (large hotel category node), using the whole dataset (100%).

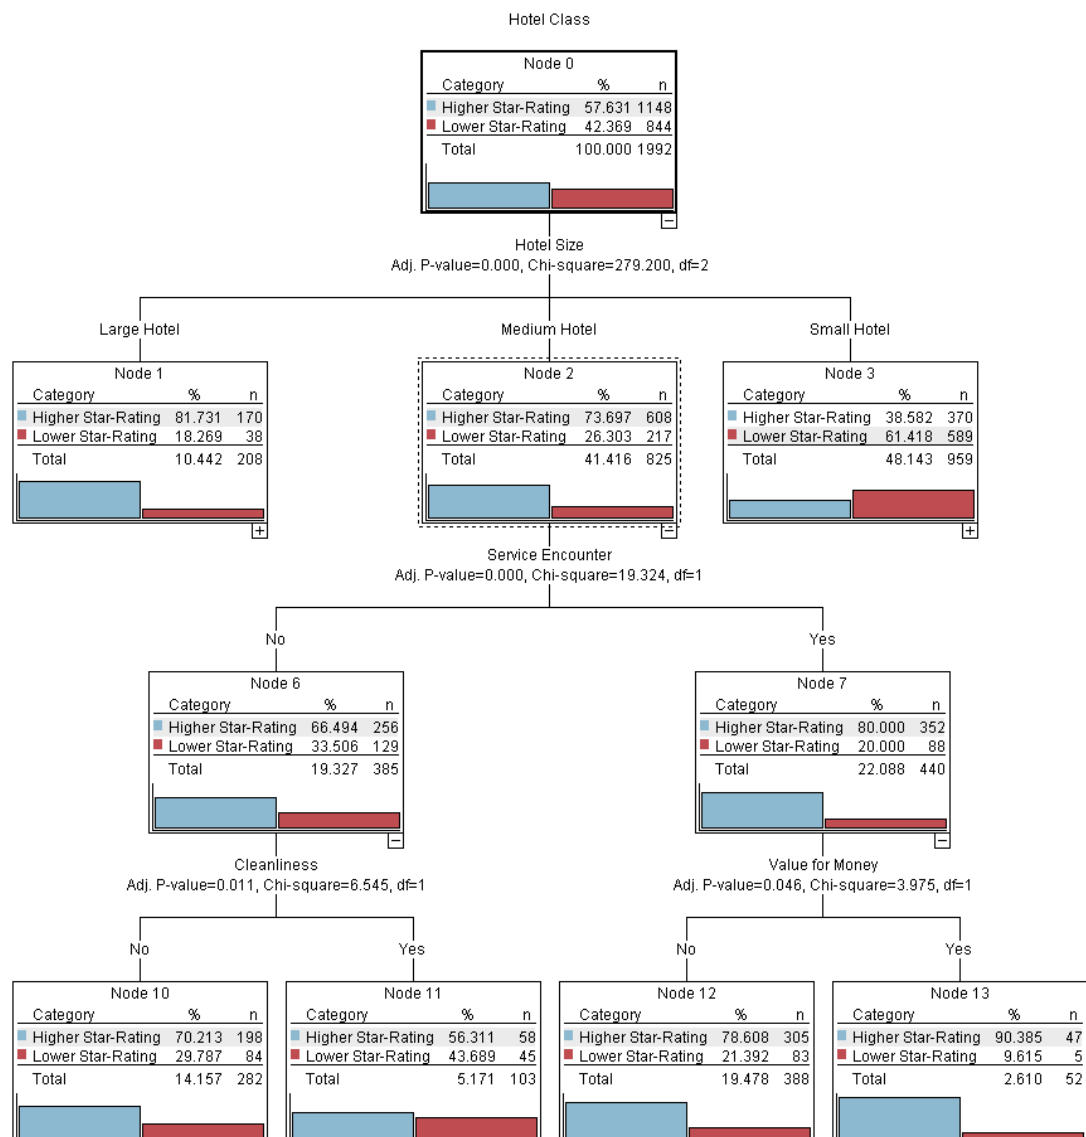

**Figure S3.** Online complaining behavior for different hotel classes (medium hotel category node), using the whole dataset (100%).

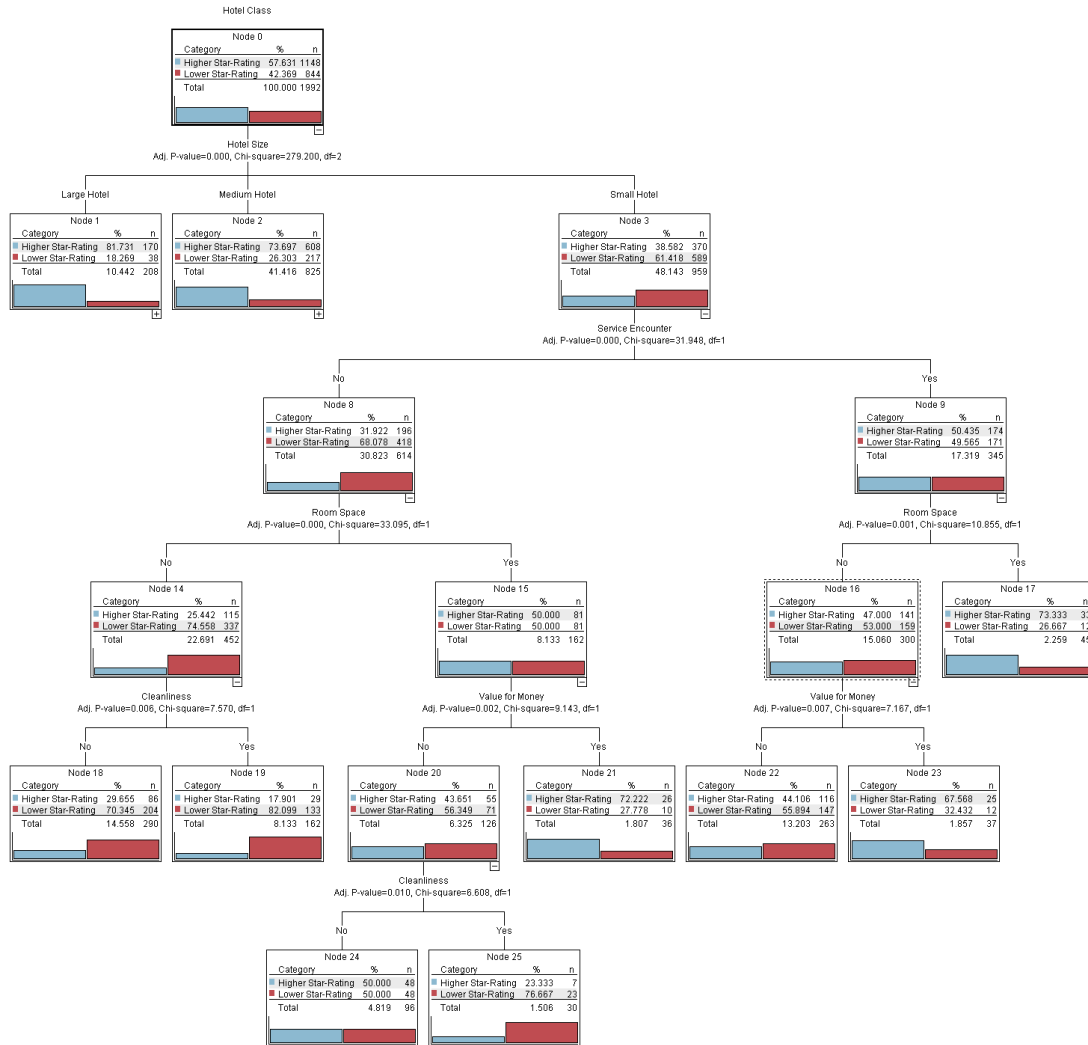

**Figure S4.** Online complaining behavior for different hotel classes (small hotel category node), using the whole dataset (100%).
